# Supplementary material
Source: PubMed Central journal article supplement (PMC10557029)
Supplement: jamaoncol-e234267-s001.pdf [file jamaoncol-e234267-s001.pdf]

## Supplementary Online Content

Yu JB, Sun Y, Jia AY, et al. Increasing use of shorter-course radiotherapy for prostate cancer. *JAMA Oncol*. Published online October 5, 2023. doi:10.1001/jamaoncol.2023.4267

**eFigure.** Selection of Sample

**eTable 1.** Rates of Fractionation Categories Overall by Year of Diagnosis

**eTable 2.** Fractionation Categories by Risk Grouping and Year

**eTable 3.** Descriptive Data by Year of Diagnosis

**eTable 4.** Full Multivariable Logistic Regression: Temporal Effect on Shorter Course Radiotherapy and Ultra-Hypofractionated Radiotherapy Use

This supplementary material has been provided by the authors to give readers additional information about their work.

**eFigure.** Selection of sample

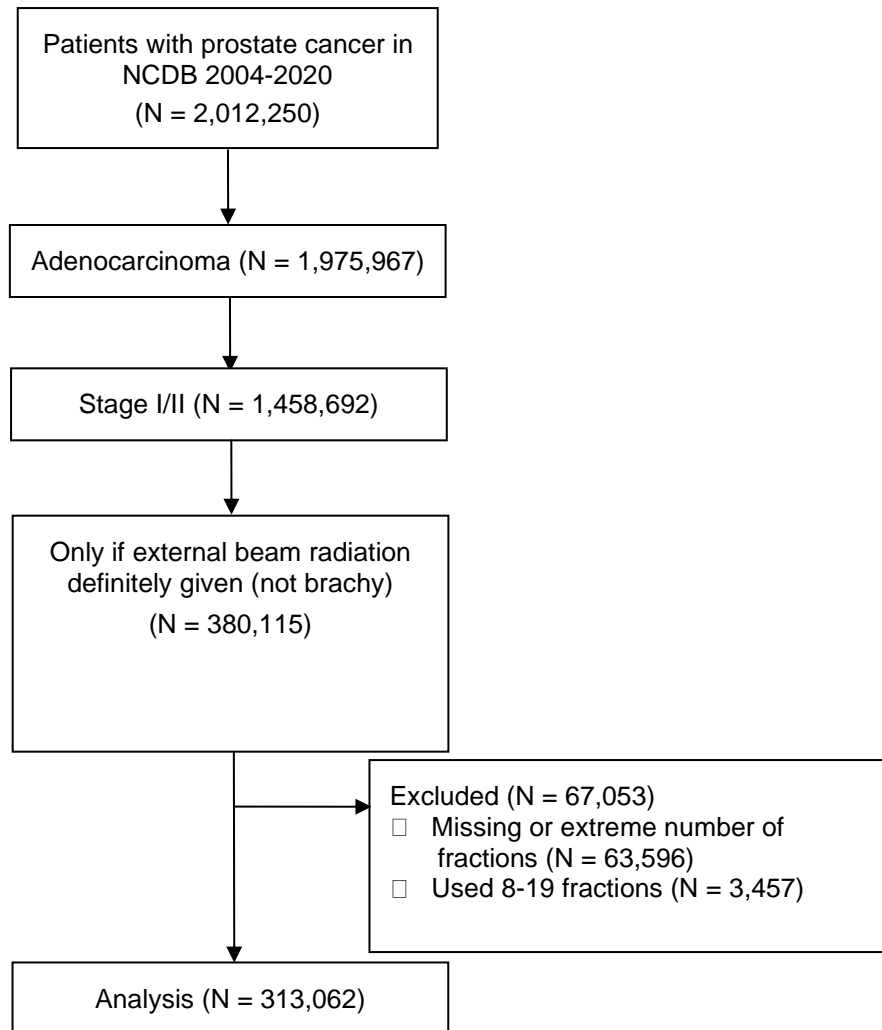

**eTable 1.** Rates of fractionation categories overall by year of diagnosis

| <b>Year of Diagnosis</b> | <b>Ultra-hypo-fractionation (%)</b> | <b>Moderate-hypo-fractionation (%)</b> | <b>Conventional fractionation (%)</b> |
|--------------------------|-------------------------------------|----------------------------------------|---------------------------------------|
| <b>2004</b>              | 2                                   | 21.98                                  | 76.02                                 |
| <b>2005</b>              | 2.19                                | 21.47                                  | 76.34                                 |
| <b>2006</b>              | 3.45                                | 19.15                                  | 77.41                                 |
| <b>2007</b>              | 4.92                                | 17.86                                  | 77.23                                 |
| <b>2008</b>              | 5.74                                | 16.51                                  | 77.75                                 |
| <b>2009</b>              | 5.85                                | 16.3                                   | 77.85                                 |
| <b>2010</b>              | 6.29                                | 15.1                                   | 78.61                                 |
| <b>2011</b>              | 6.65                                | 15.12                                  | 78.23                                 |
| <b>2012</b>              | 7.76                                | 14.32                                  | 77.92                                 |
| <b>2013</b>              | 9.35                                | 14.32                                  | 76.33                                 |
| <b>2014</b>              | 9.59                                | 14.43                                  | 75.99                                 |
| <b>2015</b>              | 10.59                               | 15.98                                  | 73.43                                 |
| <b>2016</b>              | 12.34                               | 19.82                                  | 67.84                                 |
| <b>2017</b>              | 13.09                               | 26.06                                  | 60.84                                 |
| <b>2018</b>              | 16.1                                | 27.88                                  | 56.02                                 |
| <b>2019</b>              | 17.94                               | 36.1                                   | 45.96                                 |
| <b>2020</b>              | 18.33                               | 45.02                                  | 36.65                                 |

**eTable 2.** Fractionation categories by risk grouping and year

| NCCN Risk Group          | Year of Diagnosis | Ultra-hypo-fractionation (%) | Moderate-hypo-fractionation (%) | Conventional fractionation (%) |
|--------------------------|-------------------|------------------------------|---------------------------------|--------------------------------|
| Low                      | 2004              | 1.62                         | 14.98                           | 83.4                           |
| Low                      | 2005              | 2.26                         | 13.75                           | 83.98                          |
| Low                      | 2006              | 5.32                         | 12.85                           | 81.83                          |
| Low                      | 2007              | 7.32                         | 11.8                            | 80.88                          |
| Low                      | 2008              | 8.68                         | 11.24                           | 80.08                          |
| Low                      | 2009              | 8.18                         | 10.94                           | 80.88                          |
| Low                      | 2010              | 11.34                        | 8.45                            | 80.22                          |
| Low                      | 2011              | 12.37                        | 8.37                            | 79.25                          |
| Low                      | 2012              | 14.76                        | 6.79                            | 78.45                          |
| Low                      | 2013              | 18.96                        | 6.99                            | 74.05                          |
| Low                      | 2014              | 18.32                        | 7.06                            | 74.62                          |
| Low                      | 2015              | 23.09                        | 5.81                            | 71.1                           |
| Low                      | 2016              | 27.16                        | 10.6                            | 62.24                          |
| Low                      | 2017              | 30.9                         | 15.78                           | 53.32                          |
| Low                      | 2018              | 30.55                        | 22.14                           | 47.32                          |
| Low                      | 2019              | 33.05                        | 29.65                           | 37.3                           |
| Low                      | 2020              | 37.76                        | 33.99                           | 28.26                          |
| Favorable Intermediate   | 2004              | 1.78                         | 23.7                            | 74.52                          |
| Favorable Intermediate   | 2005              | 2.06                         | 22.93                           | 75.01                          |
| Favorable Intermediate   | 2006              | 3.54                         | 18.77                           | 77.69                          |
| Favorable Intermediate   | 2007              | 4.88                         | 17.89                           | 77.23                          |
| Favorable Intermediate   | 2008              | 6.19                         | 18.09                           | 75.73                          |
| Favorable Intermediate   | 2009              | 7.1                          | 15.88                           | 77.02                          |
| Favorable Intermediate   | 2010              | 7.38                         | 14.27                           | 78.35                          |
| Favorable Intermediate   | 2011              | 8.53                         | 13.59                           | 77.88                          |
| Favorable Intermediate   | 2012              | 11.28                        | 13.28                           | 75.44                          |
| Favorable Intermediate   | 2013              | 13.06                        | 13.1                            | 73.84                          |
| Favorable Intermediate   | 2014              | 14.74                        | 11.72                           | 73.53                          |
| Favorable Intermediate   | 2015              | 16                           | 13.23                           | 70.77                          |
| Favorable Intermediate   | 2016              | 20.31                        | 15.53                           | 64.15                          |
| Favorable Intermediate   | 2017              | 22.41                        | 23.93                           | 53.66                          |
| Favorable Intermediate   | 2018              | 24.79                        | 25.83                           | 49.37                          |
| Favorable Intermediate   | 2019              | 27.37                        | 34.4                            | 38.23                          |
| Favorable Intermediate   | 2020              | 27.73                        | 41.8                            | 30.46                          |
| Unfavorable Intermediate | 2004              | 2.21                         | 26.75                           | 71.05                          |
| Unfavorable Intermediate | 2005              | 2.29                         | 27.04                           | 70.67                          |
| Unfavorable Intermediate | 2006              | 2.82                         | 23.71                           | 73.48                          |
| Unfavorable Intermediate | 2007              | 3.82                         | 22.12                           | 74.06                          |
| Unfavorable Intermediate | 2008              | 4.49                         | 19.72                           | 75.79                          |
| Unfavorable Intermediate | 2009              | 5.07                         | 19.44                           | 75.5                           |
| Unfavorable Intermediate | 2010              | 5.1                          | 18.58                           | 76.32                          |
| Unfavorable Intermediate | 2011              | 4.99                         | 19.29                           | 75.72                          |
| Unfavorable Intermediate | 2012              | 6.69                         | 16.75                           | 76.56                          |
| Unfavorable Intermediate | 2013              | 8.69                         | 16.82                           | 74.48                          |
| Unfavorable Intermediate | 2014              | 9.32                         | 16.84                           | 73.84                          |
| Unfavorable Intermediate | 2015              | 11.13                        | 18.14                           | 70.73                          |
| Unfavorable Intermediate | 2016              | 13.04                        | 21.76                           | 65.19                          |
| Unfavorable Intermediate | 2017              | 14                           | 27.97                           | 58.03                          |
| Unfavorable Intermediate | 2018              | 15.23                        | 30.19                           | 54.58                          |

|                     |      |       |       |       |
|---------------------|------|-------|-------|-------|
| <b>Unfavorable</b>  | 2019 | 16.79 | 39.45 | 43.75 |
| <b>Intermediate</b> |      |       |       |       |
| <b>Unfavorable</b>  | 2020 | 16.33 | 48.92 | 34.76 |
| <b>Intermediate</b> |      |       |       |       |
| <b>High</b>         | 2004 | 2.17  | 21.57 | 76.26 |
| <b>High</b>         | 2005 | 2.22  | 22.42 | 75.36 |
| <b>High</b>         | 2006 | 1.91  | 20.47 | 77.62 |
| <b>High</b>         | 2007 | 2.98  | 18.83 | 78.2  |
| <b>High</b>         | 2008 | 3.34  | 16.66 | 80    |
| <b>High</b>         | 2009 | 3.76  | 17.64 | 78.6  |
| <b>High</b>         | 2010 | 3.68  | 16.78 | 79.55 |
| <b>High</b>         | 2011 | 3.58  | 16.34 | 80.08 |
| <b>High</b>         | 2012 | 3.48  | 16.37 | 80.14 |
| <b>High</b>         | 2013 | 3.91  | 15.89 | 80.2  |
| <b>High</b>         | 2014 | 4.22  | 16.25 | 79.54 |
| <b>High</b>         | 2015 | 3.45  | 18.4  | 78.15 |
| <b>High</b>         | 2016 | 3.57  | 22.85 | 73.59 |
| <b>High</b>         | 2017 | 3.69  | 27.65 | 68.66 |
| <b>High</b>         | 2018 | 3.91  | 27.77 | 68.32 |
| <b>High</b>         | 2019 | 4.2   | 33.38 | 62.43 |
| <b>High</b>         | 2020 | 5.97  | 43.15 | 50.88 |

Abbreviations: NCCN, National Comprehensive Cancer Network



**eTable 4.** Full Multivariable Logistic Regression: Temporal effect on shorter course radiotherapy and ultra-hypofractionated radiotherapy use

| Variables                                                                            | Shorter Course Use |           |        | Ultra-hypofractionation Use <sup>†</sup> |           |        |
|--------------------------------------------------------------------------------------|--------------------|-----------|--------|------------------------------------------|-----------|--------|
|                                                                                      | Odds Ratios        | 95% CI    | p      | Odds Ratios                              | 95% CI    | p      |
| Year of Diagnosis (Every 5 years change)                                             | 1.59               | 1.58-1.61 | <0.001 | 2.16                                     | 2.13-2.20 | <0.001 |
| Age (Every 10 years older)                                                           | 0.76               | 0.75-0.77 | <0.001 | 0.88                                     | 0.86-0.90 | <0.001 |
| Rural vs.* Metro                                                                     | 0.94               | 0.88-1.01 | 0.091  | 1.11                                     | 0.97-1.26 | 0.132  |
| Urban vs.* Metro                                                                     | 1.03               | 1.00-1.06 | 0.03   | 1.13                                     | 1.08-1.19 | <0.001 |
| African-American vs.* White                                                          | 0.9                | 0.87-0.92 | <0.001 | 0.78                                     | 0.75-0.81 | <0.001 |
| Asian/PI vs.* White                                                                  | 1                  | 0.94-1.06 | 0.968  | 0.84                                     | 0.76-0.94 | 0.001  |
| Native American vs.* White                                                           | 1.23               | 1.03-1.48 | 0.025  | 2.37                                     | 1.83-3.07 | <0.001 |
| Other/Unrecorded vs.* White                                                          | 0.98               | 0.91-1.04 | 0.467  | 0.88                                     | 0.79-0.97 | 0.013  |
| Facility Location (East South Central vs.* East North Central)                       | 1.64               | 1.57-1.72 | <0.001 | 2.01                                     | 1.87-2.17 | <0.001 |
| Facility Location (Middle Atlantic vs.* East North Central)                          | 1.48               | 1.43-1.52 | <0.001 | 2.29                                     | 2.18-2.41 | <0.001 |
| Facility Location (Mountain vs.* East North Central)                                 | 1.96               | 1.86-2.07 | <0.001 | 2.25                                     | 2.07-2.46 | <0.001 |
| Facility Location (New England vs.* East North Central)                              | 0.54               | 0.51-0.56 | <0.001 | 0.79                                     | 0.73-0.85 | <0.001 |
| Facility Location (Pacific vs.* East North Central)                                  | 1.22               | 1.18-1.26 | <0.001 | 1.25                                     | 1.17-1.34 | <0.001 |
| Facility Location (South Atlantic vs.* East North Central)                           | 1.67               | 1.62-1.72 | <0.001 | 1.58                                     | 1.50-1.67 | <0.001 |
| Facility Location (West North Central vs.* East North Central)                       | 1.14               | 1.09-1.19 | <0.001 | 1.39                                     | 1.30-1.50 | <0.001 |
| Facility Location (West South Central vs.* East North Central)                       | 0.8                | 0.76-0.84 | <0.001 | 1.01                                     | 0.93-1.10 | 0.834  |
| Median Income: ≥\$57,857+ vs.* ≤\$57,856                                             | 1.28               | 1.25-1.31 | <0.001 | 1.52                                     | 1.47-1.58 | <0.001 |
| Insurance: Medicare vs.* Medicaid                                                    | 1.49               | 1.41-1.57 | <0.001 | 1.58                                     | 1.43-1.74 | <0.001 |
| Insurance: Not Insured vs.* Medicaid                                                 | 0.92               | 0.83-1.02 | 0.113  | 1.16                                     | 0.97-1.39 | 0.115  |
| Insurance: Other Government vs.* Medicaid                                            | 1                  | 0.93-1.07 | 0.994  | 1.06                                     | 0.93-1.20 | 0.409  |
| Insurance: Private Insurance / Managed Care vs.* Medicaid                            | 1.54               | 1.45-1.62 | <0.001 | 1.62                                     | 1.46-1.78 | <0.001 |
| Insurance: Unknown vs.* Medicaid                                                     | 1.46               | 1.34-1.60 | <0.001 | 2.35                                     | 2.06-2.70 | <0.001 |
| Facility Type: Community Cancer Program vs.* Academic/Research Program               | 0.54               | 0.52-0.56 | <0.001 | 0.21                                     | 0.19-0.23 | <0.001 |
| Facility Type: Comprehensive Community Cancer Program vs.* Academic/Research Program | 0.63               | 0.61-0.64 | <0.001 | 0.46                                     | 0.45-0.48 | <0.001 |
| Facility Type: Integrated Network Cancer Program vs.* Academic/Research Program      | 0.81               | 0.79-0.83 | <0.001 | 0.6                                      | 0.58-0.63 | <0.001 |
| Comorbidity Score: 1 vs.* 0                                                          | 1                  | 0.97-1.03 | 0.845  | 0.99                                     | 0.94-1.04 | 0.647  |
| Comorbidity Score: 2 vs.* 0                                                          | 0.94               | 0.89-0.99 | 0.026  | 0.78                                     | 0.71-0.86 | <0.001 |
| Comorbidity Score: 3 vs.* 0                                                          | 1.02               | 0.95-1.10 | 0.624  | 0.61                                     | 0.54-0.70 | <0.001 |
| NCCN Low vs.* High Risk                                                              | 1.06               | 1.03-1.09 | <0.001 | 5.31                                     | 5.04-5.59 | <0.001 |
| NCCN Fav Intermediate vs.* High Risk                                                 | 1.39               | 1.36-1.43 | <0.001 | 3.9                                      | 3.71-4.09 | <0.001 |
| NCCN Unfav Intermediate vs.* High Risk                                               | 1.46               | 1.42-1.49 | <0.001 | 2.41                                     | 2.30-2.53 | <0.001 |

\*Reference value

<sup>†</sup> Comparison of ultra-hypofractionation versus all other standard forms of external beam radiotherapy (i.e. moderate-hypofractionation and conventional fractionation).

Abbreviations: NCCN, National Comprehensive Cancer Network; NCI, National Cancer Institute; Fav, favorable; unfav, unfavorable; PI, Pacific Islander.
