# Supplementary material
Source: PubMed Central journal article supplement (PMC10557029)
Supplement: jamaoncol-e234267-s002.pdf [file jamaoncol-e234267-s002.pdf]

## Data Sharing Statement

Yu. Increasing Use of Shorter-Course Radiotherapy for Prostate Cancer. *JAMA Oncol.*  
Published October 05, 2023. doi:10.1001/jamaoncol.2023.4267

### Data

**Data available:** No

### Additional Information

**Explanation for why data not available:** The data used can be accessed directly through applications to the National Cancer DataBase (NCDB), and we do not carry the rights to distribute the data directly.
